# Supplementary material for: Comprehensive microRNA-sequencing of exosomes derived from head and neck carcinoma cells in vitro reveals common secretion profiles and potential utility as salivary biomarkers
Source: PubMed Central journal article supplement (PMC5669904; doi:10.18632/oncotarget.19614), 2017-07-27
Supplement: oncotarget-08-82459-s001.pdf [file oncotarget-08-82459-s001.pdf]

## **Comprehensive microRNA-sequencing of exosomes derived from head and neck carcinoma cells *in vitro* reveals common secretion profiles and potential utility as salivary biomarkers**

### **SUPPLEMENTARY MATERIALS**

**Supplementary Table 1: Differentially secreted miRNA for HNSCC cell lines relative to primary non-pathologic oral epithelial control cells (Q < 0.1)**

See Supplementary File 1

**Supplementary Table 2: KEGG pathways that were enriched among experimentally supported (TarBase) targets of miRNA that were differentially secreted by all 4 HNSCC cell lines relative to primary non-pathologic oral epithelial control cells**

See Supplementary File 1

**Supplementary Table 3: KEGG pathways that were enriched among predicted (MicroT-CDS) targets of miRNA that were differentially secreted by all 4 HNSCC cell lines relative to primary non-pathologic oral epithelial control cells**

See Supplementary File 1

**Supplementary Table 4: GO categories that were enriched among experimentally supported (TarBase) targets of miRNA that were differentially secreted by all 4 HNSCC cell lines relative to primary non-pathologic oral epithelial control cells**

See Supplementary File 1

**Supplementary Table 5: GO categories that were enriched among predicted (MicroT-CDS) targets of miRNA that were differentially secreted by all 4 HNSCC cell lines relative to primary non-pathologic oral epithelial control cells**

See Supplementary File 1
